# Supplementary material for: Increased glycolysis correlates with elevated immune activity in tumor immune microenvironment
Source: PubMed Central journal article supplement — eBioMedicine. 2019 Mar 29;42:431–42. doi: 10.1016/j.ebiom.2019.03.068 (PMC6491961; doi:10.1016/j.ebiom.2019.03.068), 2019-03-29

Immune score ~ TMB + Purity + Aneuploidy + Glycolysis

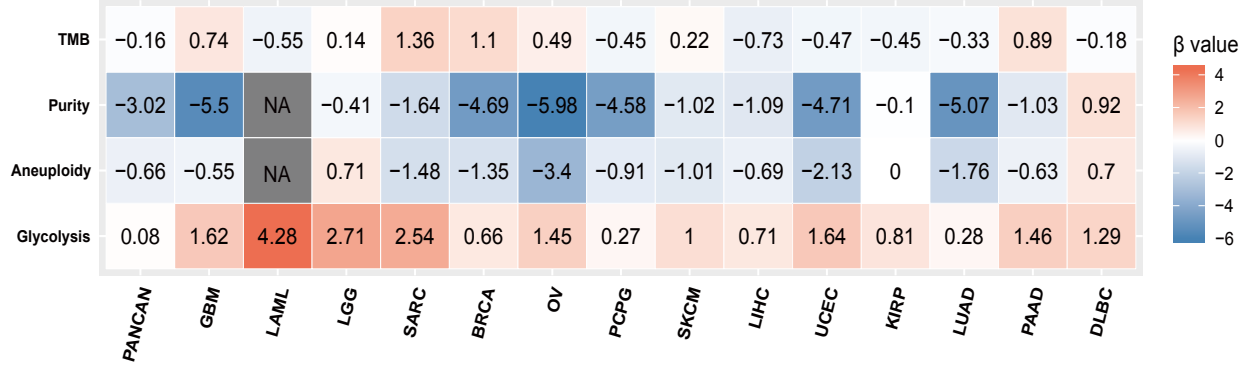

Cytolytic activity ~ TMB + Purity + Aneuploidy + Glycolysis

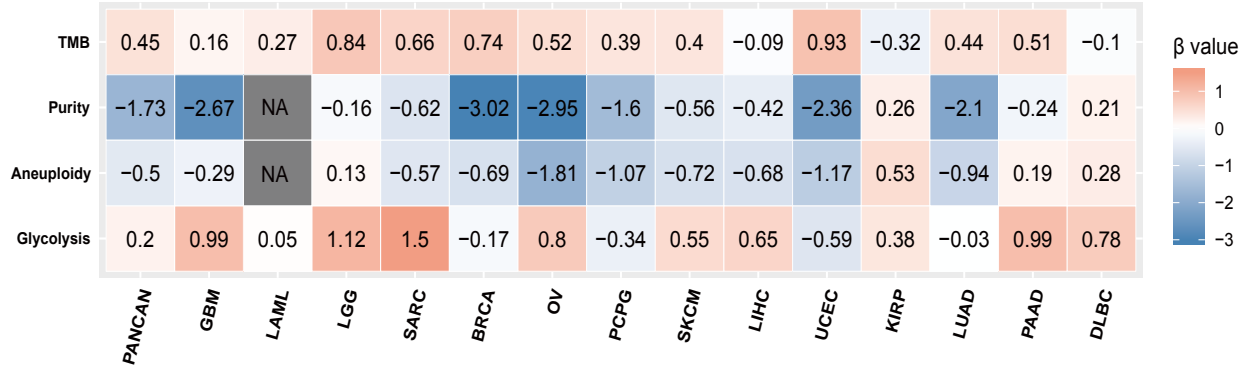

Supplement: mmc2.pdf [file mmc2.pdf]
