# Supplementary figures and images for: Increased glycolysis correlates with elevated immune activity in tumor immune microenvironment
Source: PubMed Central journal article supplement — eBioMedicine. 2019 Mar 29;42:431–42. doi: 10.1016/j.ebiom.2019.03.068 (PMC6491961; doi:10.1016/j.ebiom.2019.03.068), 2019-03-29

**A**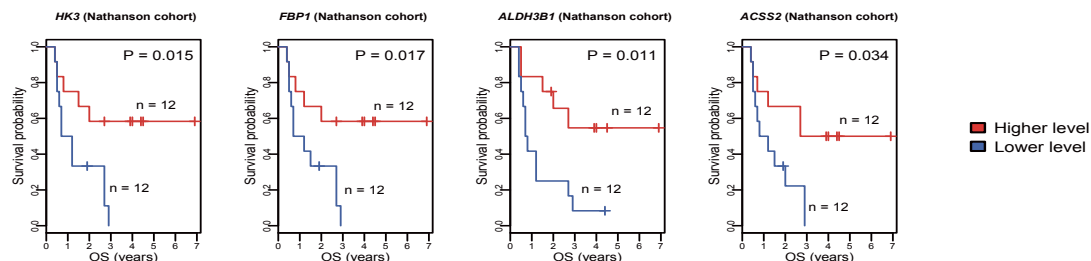**B**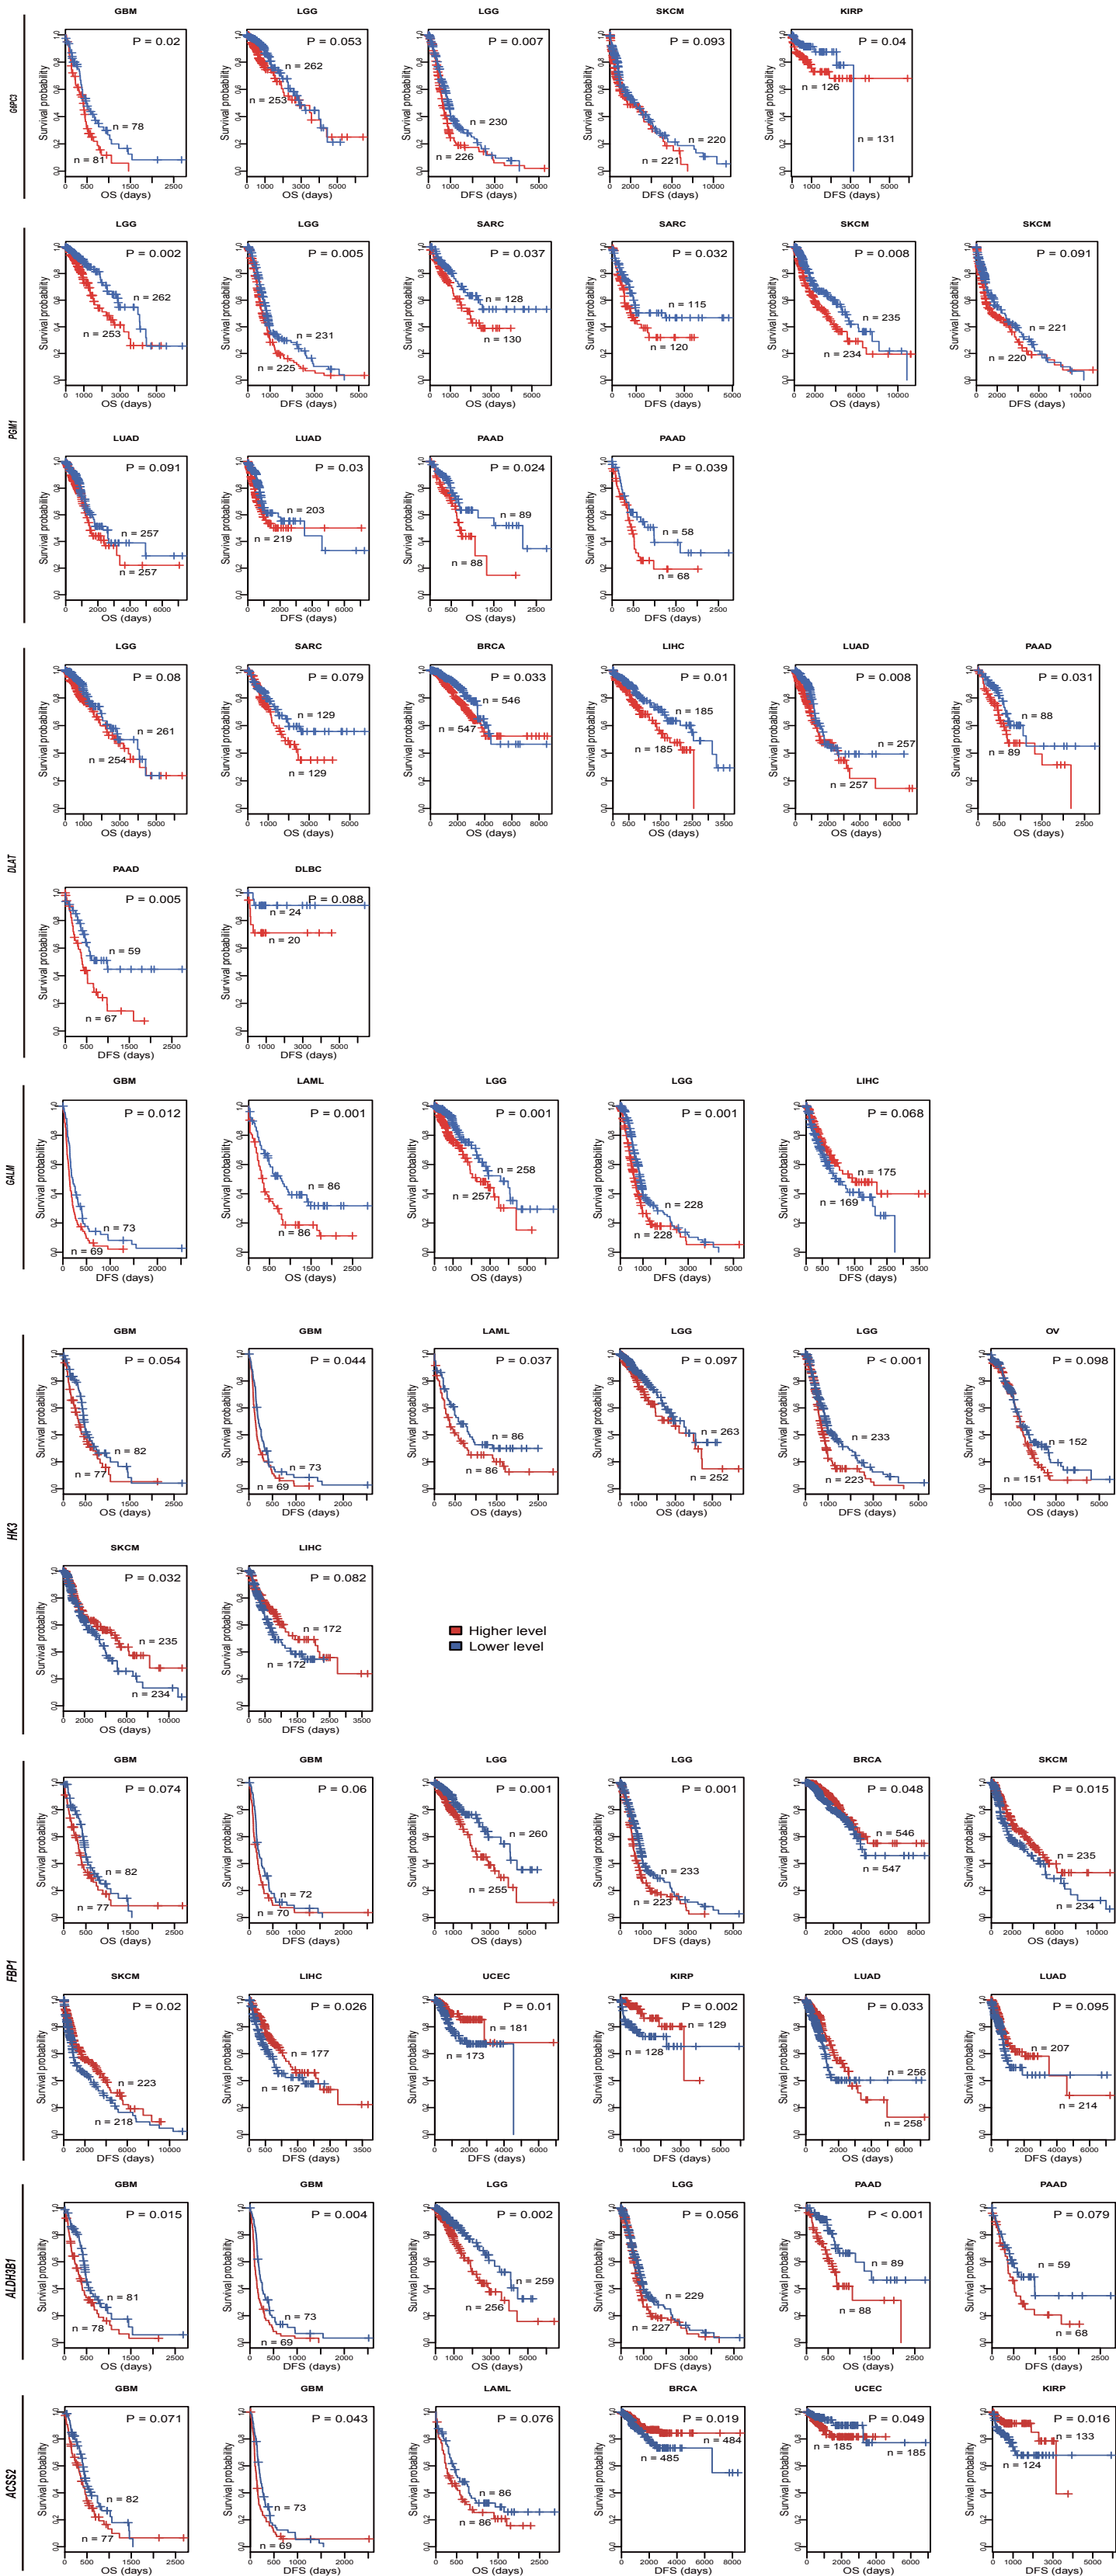

Supplement: mmc1.pdf [file mmc1.pdf]

### Highly glycolytic vs. Lowly glycolytic (Student's *t* test)

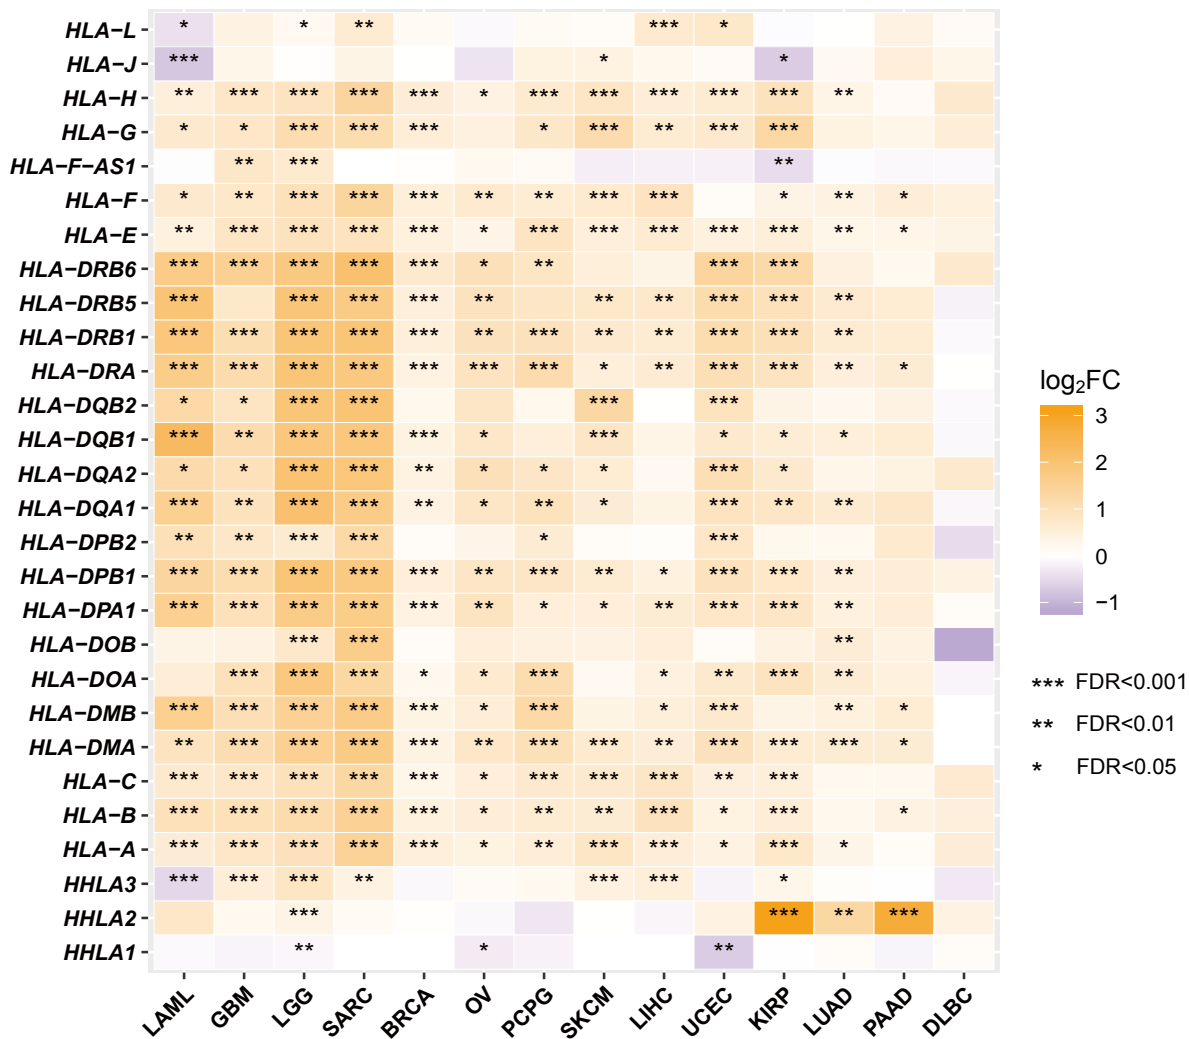

Supplement: mmc3.pdf [file mmc3.pdf]
